# Supplementary material
Source: PubMed Central journal article supplement (PMC3062502)
Supplement: NIHMS264187-supplement-01.pdf [file NIHMS264187-supplement-01.pdf]

**Table S1. Statistics for Life Spans of Figure 1, Figure 2, Figure 4, and Figure 6**

| Strain                                                                     | Mean Life span $\pm$ SEM (days) | Median (days) | 75th Percent ile (days) | Total # Animals Died/Total | P-value             |
|----------------------------------------------------------------------------|---------------------------------|---------------|-------------------------|----------------------------|---------------------|
| <b>Figure 1</b>                                                            |                                 |               |                         |                            |                     |
| <i>sid-1(qt9) Ex.rol-6 marker</i>                                          | 18.8 $\pm$ 0.7                  | 19            | 24                      | 77/104                     |                     |
| <i>ges-1p::cco-1HP</i>                                                     | 23.9 $\pm$ 0.8                  | 24            | 28                      | 74/108                     | <.0001              |
| wildtype N2                                                                | 18.2 $\pm$ 0.5                  | 17            | 21                      | 64/106                     |                     |
| <i>rab-3p::cco-1HP</i>                                                     | 21.5 $\pm$ 0.5                  | 23            | 25                      | 74/104                     | <.0001              |
| <i>sid-1(qt9) Ex.rol-6 marker</i>                                          | 18.6 $\pm$ .7                   | 18            | 22                      | 56/96                      |                     |
| <i>myo-3p::cco-1HP</i>                                                     | 16.6 $\pm$ .5                   | 16            | 20                      | 76/100                     | 0.0574              |
| <i>sid-1(qt9) Ex.rol-6 marker</i>                                          | 19.8 $\pm$ 0.7                  | 19            | 23                      | 73/104                     |                     |
| <i>unc-119p::cco-1HP</i>                                                   | 23.8 $\pm$ 0.8                  | 24            | 28                      | 65/104                     | 0.0001              |
| <b>Figure 2</b>                                                            |                                 |               |                         |                            |                     |
| N2 on EV                                                                   | 16.1 $\pm$ 0.4                  | 16            | 20                      | 91/97                      | <.0001              |
| N2 on <i>cco-1</i> RNAi                                                    | 23.1 $\pm$ 0.6                  | 24            | 27                      | 93/104                     |                     |
| <i>rde-1(ne219)</i> on empty vector                                        | 18.0 $\pm$ 0.3                  | 16            | 20                      | 103/113                    | .4043               |
| <i>rde-1(ne219)</i> on <i>cco-1</i>                                        | 18.2 $\pm$ 0.4                  | 18            | 21                      | 96/111                     |                     |
| Intestinal <i>nhx-1p::rde-1</i> rescue on EV                               | 14.6 $\pm$ 0.6                  | 15            | 17                      | 85/101                     | <.0001              |
| Intestine <i>nhx-1p::rde-1</i> on <i>cco-1</i> RNAi                        | 22.0 $\pm$ 0.2                  | 23            | 27                      | 77/103                     |                     |
| Muscle <i>hlh-1p::rde-1</i> rescue on EV                                   | 13.5 $\pm$ 0.3                  | 14            | 15                      | 64/115                     | <.0002              |
| Muscle <i>hlh-1p::rde-1</i> rescue on <i>cco-1</i> RNAi                    | 11.8 $\pm$ 0.3                  | 12            | 13                      | 51/116                     |                     |
| Hypodermis <i>rde-1</i> rescue on EV                                       | 13.4 $\pm$ 0.4                  | 15            | 16                      | 100/127                    | 0.148               |
| Hypodermis <i>rde-1</i> rescue on <i>cco-1</i> RNAi                        | 14.3 $\pm$ 0.4                  | 15            | 18                      | 98/122                     |                     |
| Intestinal <i>nhx-1p::rde-1</i> rescue on EV                               | 16.3 $\pm$ 0.4                  | 16            | 18                      | 79/92                      |                     |
| Intestinal <i>nhx-1p::rde-1</i> rescue on EV/ <i>daf-16</i> RNAi (50/50)   | 16.4 $\pm$ 0.4                  | 16            | 18                      | 92/104                     | 0.8164              |
| Intestinal <i>nhx-1p::rde-1</i> rescue on <i>cco-1/daf-16</i> RNAi (50/50) | 19.9 $\pm$ 0.6                  | 18            | 24                      | 51/103                     | <.0001              |
| <i>sid-1(qt9)</i>                                                          | 19.2 $\pm$ 0.5                  | 19            | 22                      | 83/109                     |                     |
| <i>rab-3::cco-1HP</i>                                                      | 23.4 $\pm$ 0.6                  | 25            | 27                      | 68/121                     | .64 (to cross)      |
| <i>ges-1::cco-1HP</i>                                                      | 22.9 $\pm$ 0.6                  | 23            | 27                      | 79/133                     | .75 (to cross)      |
| <i>rab-3::cco-1HPxges-1::cco-1HP</i>                                       | 23.2 $\pm$ 0.5                  | 24            | 25                      | 92/130                     | <.0001 (to control) |
| <b>Figure 4</b>                                                            |                                 |               |                         |                            |                     |
| N2 on EV                                                                   | 19.0 $\pm$ 0.5                  | 21            | 22                      | 85/98                      | 0.0834              |
| N2 on <i>ubl-5</i> RNAi                                                    | 20.3 $\pm$ 0.4                  | 21            | 24                      | 87/103                     |                     |
| <i>daf-2(e1370)</i> on EV                                                  | 40.1 $\pm$ 1.2                  | 43            | 49                      | 67/124                     |                     |
| <i>daf-2(e1370)</i> on <i>ubl-5</i> RNAi                                   | 39.9 $\pm$ 1.2                  | 42            | 50                      | 58/137                     | 0.3273              |
| <i>eat-2(ad116)</i> on EV                                                  | 26.4 $\pm$ .6                   | 29            | 30                      | 77/112                     |                     |

|                                          |          |    |    |        |        |
|------------------------------------------|----------|----|----|--------|--------|
| <i>eat-2(ad116)</i> on <i>ubl-5</i> RNAi | 23.3±7   | 23 | 29 | 75/105 | 0.0004 |
| N2 on EV                                 | 18.2±0.4 | 18 | 21 | 94/104 |        |
| <i>isp-1(qm150)</i> on EV                | 25.8±1.0 | 27 | 33 | 64/126 | <.0001 |
| <i>isp-1(qm150)</i> on <i>ubl-5</i> RNAi | 15.5±0.7 | 13 | 18 | 37/94  |        |
| <b>Transgenic strain analysis</b>        |          |    |    |        |        |
| N2 on EV                                 | 17.3±0.4 | 17 | 20 | 92/99  |        |
| <i>sid-1(qt9)</i> on EV                  | 19.6±0.5 | 19 | 24 | 88/100 |        |
| 37.1 <i>sid-1/rol-6</i>                  | 18.8±0.6 | 19 | 24 | 77/104 |        |
| 19.5 <i>unc-119p::cco-1HP</i>            | 21.0±0.6 | 20 | 25 | 84/104 | .0341  |
| 53.2 <i>ges-1p::cco-1HP</i>              | 21.5±0.6 | 22 | 25 | 86/108 | <.0001 |
| 54.1 <i>ges-1p::cco-1HP</i>              | 22.1±0.8 | 22 | 25 | 69/105 | 0.0024 |
| 54.3 <i>ges-1p::cco-1HP</i>              | 22.8±0.7 | 24 | 28 | 82/109 | 0.0067 |
| 54.5 <i>ges-1p::cco-1HP</i>              | 21.9±0.6 | 22 | 25 | 86/100 | 0.0021 |
| 55.9 <i>ges-1p::cco-1HP</i>              | 23.9±0.8 | 24 | 28 | 74/108 | <.0001 |
| A2 <i>ges-1p::cco-1HP</i>                | 21.8±0.7 | 22 | 25 | 83/111 | 0.0034 |
| 65.11 <i>myo-3p::cco-1HP</i>             | 14.4±0.5 | 15 | 15 | 92/113 | <.0001 |
| 66.15 <i>myo-3p::cco-1HP</i>             | 15.2±0.5 | 15 | 17 | 81/111 | <.0001 |
| 66.2 <i>myo-3p::cco-1HP</i>              | 15.9±0.5 | 15 | 17 | 92/122 | 0.0024 |
| 66.2a <i>myo-3p::cco-1HP</i>             | 15.6±0.5 | 15 | 17 | 72/115 | <.0001 |
| 66.6 <i>myo-3p::cco-1HP</i>              | 17.3±0.8 | 15 | 17 | 72/100 | 0.2618 |
| 70.11 <i>myo-3p::cco-1HP</i>             | 14.5±0.5 | 15 | 15 | 67/103 | <.0001 |
| N2 on EV                                 | 18.2±0.5 | 17 | 21 | 74/104 |        |
| N2 on <i>cco-1</i> RNAi                  | 26.1±0.6 | 27 | 30 | 47/64  | <.0001 |
| W <i>rab-1p::cco-1HP</i>                 | 21.8±0.6 | 23 | 25 | 66/108 | <.0001 |
| B3 <i>rab-1p::cco-1HP</i>                | 19.6±0.8 | 19 | 25 | 49/123 | 0.0180 |
| <i>sid-1(qt9)</i>                        | 17.4±0.7 | 18 | 20 | 49/80  |        |
| <i>sid-1(qt9)/rol-6</i>                  | 14.5±0.5 | 13 | 18 | 84/120 |        |
| 13.14 <i>unc-119p::cco-1HP</i>           | 20.1±0.7 | 20 | 24 | 48/80  | <.0001 |
| 11.2 <i>unc-119p::cco-1HP</i>            | 17.1±1.5 | 16 | 24 | 17/60  | 0.1211 |
| 13.4 <i>unc-119p::cco-1HP</i>            | 17.2±0.7 | 17 | 21 | 42/80  | 0.0331 |
| 13.9 <i>unc-119p::cco-1HP</i>            | 19.3±0.6 | 20 | 23 | 62/82  | <.0001 |
| 18.1 <i>unc-119p::cco-1HP</i>            | 18.3±0.8 | 16 | 23 | 47/80  | <.0001 |
| 19.5 <i>unc-119p::cco-1HP</i>            | 21.9±0.7 | 21 | 25 | 66/108 | <.0001 |
| 22.1 <i>unc-119p::cco-1HP</i>            | 18.4±0.9 | 18 | 23 | 44/52  | <.0001 |
| 9.7 <i>unc-119p::cco-1HP</i>             | 16.1±0.6 | 18 | 20 | 35/60  | 0.1048 |
| N2                                       | 19.7±0.7 | 20 | 25 |        |        |
| <i>sid-1(qt9)/myo-2:GFP</i>              | 20.3±1.0 | 15 | 28 |        |        |
| Line 10 <i>ges-1p::cco-1HP</i>           | 25.9±0.6 | 28 | .  | 44/34  | <.0001 |
| Line 2 <i>ges-1p::cco-1HP</i>            | 28.2±0.8 | 33 | .  | 70/34  | <.0001 |
| Line 3 <i>ges-1p::cco-1HP</i>            | 29.5±0.8 | 30 | .  | 36/52  | <.0001 |
| Line 4 <i>ges-1p::cco-1HP</i>            | 23.5±0.7 | 25 | .  | 60/98  | 0.0009 |
| Line 5 <i>ges-1p::cco-1HP</i>            | 28.4±0.8 | 30 | 35 | 48/64  | 0.0009 |
| Line 8 <i>ges-1p::cco-1HP</i>            | 28.0±1.3 | 30 | 35 | 27/36  | <.0001 |
| Line5 <i>ges-1p::cco-1HP</i>             | 26.3±1.0 | 28 | 30 | 89/113 | <.0001 |

Life-span analysis of transgenic *cco-1* hairpin lines. Animals that died prematurely (exploded out the vulva, bagged, crawled off the plate) were censored at the time of the event. Control and experimental animals were assayed and transferred to fresh plates at the same time. JMP 8 was used for statistical analysis.

**Table S2. Statistics for Paraquat Experiments, Related to Experimental Procedures**

|                                              | % Survival at 7 hours in<br>.01mM paraquat |
|----------------------------------------------|--------------------------------------------|
| N2                                           | 59.5                                       |
| N2 on <i>cco1</i>                            | 50.0                                       |
| <i>daf-2(e1370)</i>                          | 95.2                                       |
| <i>mev-1(kn1)</i>                            | 4.8                                        |
| <i>sid-1/rol-6</i>                           | 57.1                                       |
| <i>ges-1p</i> HP                             | 50.0                                       |
| <i>rab-3p</i> HP                             | 64.3                                       |
| <i>unc-119p</i> HP                           | 28.6                                       |
| <i>myo-3</i> HP                              | 52.3                                       |
| <i>rde-1(ne219)</i>                          | 54.8                                       |
| <i>rde-1(ne219) cco-1</i> RNAi               | 76.2                                       |
| intestinal <i>rde-1</i>                      | 54.8                                       |
| intestinal <i>rde-1</i> on <i>cco-1</i> RNAi | 69.0                                       |
| muscle <i>rde-1</i>                          | 50.0                                       |
| muscle <i>rde-1</i> on <i>cco-1</i> RNAi     | 57.1                                       |

Percent survival was determined at 7 hours in 0.01mM paraquat. Mean life span was determined using JMP5.1 statistical analysis. See Supplemental Materials and Methods for assay conditions. Mean life span of animals treated with 1200 J/m<sup>2</sup> of UV. Worms were scored daily for viability. See Supplemental Materials and Methods for assay conditions.

**Table S3. Statistics for UV Experiments, Related to Experimental Procedures**

| Strain             | UV treated<br>Mean life<br>span<br>(days) |
|--------------------|-------------------------------------------|
| <i>sid-1/rol-6</i> | 4.9±0.21                                  |
| <i>ges-1p</i> HP   | 4.9±0.13                                  |
| <i>unc-119p</i> HP | 4.7±0.15                                  |
| <i>myo-3</i> HP    | 3.5±0.14                                  |

Mean life span of animals treated with 1200 J/m<sup>2</sup> of UV. Worms were scored daily for viability. See Supplemental Materials and Methods for assay conditions.

**Table S4. Statistics for Heat Shock Experiments, Related to Experimental Procedures**

| Strain              | % survival at 10 hours 35 degrees Celsius |
|---------------------|-------------------------------------------|
| N2                  | 77                                        |
| <i>daf-2(e1370)</i> | 100                                       |
| <i>mev-1(kn1)</i>   | 49                                        |
| <i>sid-1/rol-6</i>  | 37                                        |
| <i>ges-1p</i> HP    | 26                                        |
| <i>unc-119p</i> HP  | 68                                        |
| <i>myo-3</i> HP     | 26                                        |

Worms were exposed to 35°C temperature stress and assayed every 2 hours for viability. Shown above is the percent survival at 10 hours. See Supplemental Materials and Methods for assay conditions.
